# Supplementary material for: Solid state effects on the electronic structure of H2OEP
Source: Royal Society of Chemistry journal article supplement (doi:10.1039/c4cp03450c), 2014-01-01
Supplement: c4cp03450c1.pdf [file c4cp03450c1.pdf]

## Solid state effects on the electronic structure of H<sub>2</sub>OEP - Electronic Supplementary Information

M. Marsili,<sup>\*a,b</sup> P. Umari,<sup>a,c</sup> G. Di Santo,<sup>d</sup> M. Caputo,<sup>d</sup> M. Panighel,<sup>d,e</sup> A. Goldoni,<sup>d</sup> M. Kumar,<sup>f</sup> and M. Pedio<sup>f</sup>

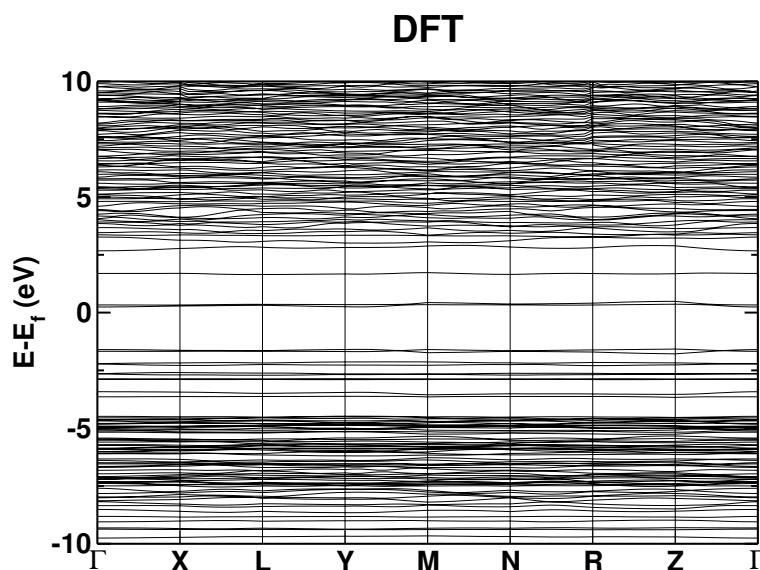

**Figure 1** DFT band structure along high symmetry directions. Energies are referred to the experimental Fermi level, aligned as explained in the text.

<sup>a</sup> Dipartimento di Fisica e Astronomia, Università di Padova, via Marzolo 8, Padova 35131, Italy. Fax: +39 049 8277102; Tel: +39 049 8277174; E-mail: margherita.marsili@nano.cnr.it

<sup>b</sup> S3, Istituto Nanoscienze-CNR, Via Campi 213/A, 41125 Modena, Italy

<sup>c</sup> IOM-CNR, Theory@Elettra group, Trieste, Italy

<sup>d</sup> Elettra - Sincrotrone Trieste, s.s. 14 km 163.5 in Area Science Park, Basovizza (Trieste) 34149, Italy

<sup>e</sup> Department of Physics, University of Trieste, via Valerio 2, Trieste 34100, Italy

<sup>f</sup> IOM-CNR, TASC Area Science Park Bul. MM, S.S. 14, Km 163.5, Basovizza (Trieste) 34149, Italy

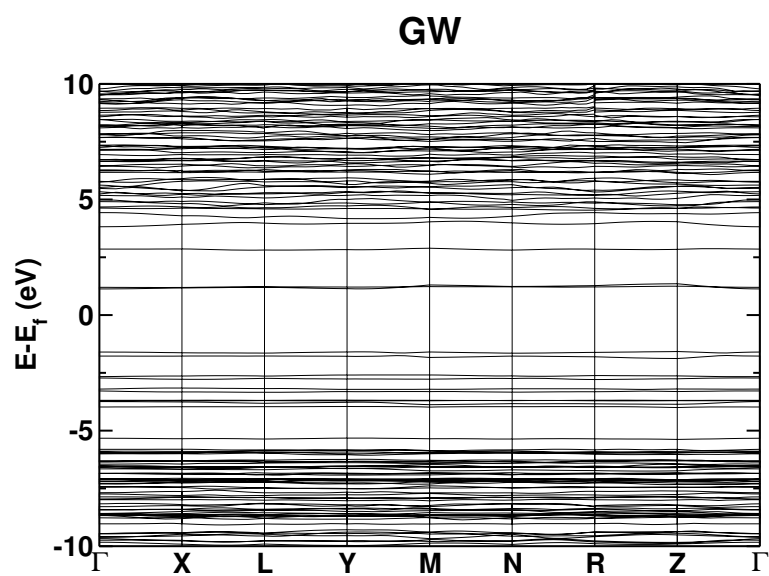

**Figure 2** GW band structure along high symmetry directions. Energies are referred to the experimental Fermi level, aligned as explained in the text.
